# Supplementary material for: Improving Mood with Physical ACTivity (IMPACT) trial: a cluster randomised controlled trial to determine the effectiveness of a brief physical activity behaviour change intervention on depressive symptoms in young people, compared with psychoeducation, in addition to routine clinical care within youth mental health services—a protocol study
Source: PubMed Central journal article supplement — BMJ Open. 2019 Oct 28;9(10):e034002. doi: 10.1136/bmjopen-2019-034002 (PMC6830686; doi:10.1136/bmjopen-2019-034002), 2019-10-28
Supplement: bmjopen-2019-034002.reviewer_comments.pdf [file bmjopen-2019-034002.reviewer_comments.pdf]

## PEER REVIEW HISTORY

BMJ Open publishes all reviews undertaken for accepted manuscripts. Reviewers are asked to complete a checklist review form (<http://bmjopen.bmj.com/site/about/resources/checklist.pdf>) and are provided with free text boxes to elaborate on their assessment. These free text comments are reproduced below.

## ARTICLE DETAILS

|                            |                                                                                                                                                                                                                                                                                                                                                      |
|----------------------------|------------------------------------------------------------------------------------------------------------------------------------------------------------------------------------------------------------------------------------------------------------------------------------------------------------------------------------------------------|
| <b>TITLE (PROVISIONAL)</b> | Protocol of the Improving Mood with Physical ACTivity (IMPACT) trial: A cluster randomised controlled trial to determine the effectiveness of a brief physical activity behaviour change intervention on depressive symptoms in young people, compared to psycho-education, in addition to routine clinical care within youth mental health services |
| <b>AUTHORS</b>             | Parker, Alexandra; Markulev, Connie; Rickwood, Debra; Mackinnon, Andrew; Purcell, Rosemary; Alvarez-Jimenez, Mario; Yung, Alison; McGorry, Patrick; Hetrick, Sarah; Jorm, A                                                                                                                                                                          |

This article was not externally reviewed at BMJ Open. Protocols that have been independently assessed prior to submission to BMJ Open are usually fast-tracked to publication on the grounds that further substantial changes will not be possible. This independent assessment will usually be external, independent review for both a substantial grant award from a non-commercial or government funder and ethics approval.
